# Supplementary material for: Qualitative study to conceptualise a model of interprofessional collaboration between pharmacists and general practitioners to support patients' adherence to medication
Source: PubMed Central journal article supplement — BMJ Open. 2016 Mar 16;6(3):e010488. doi: 10.1136/bmjopen-2015-010488 (PMC4800113; doi:10.1136/bmjopen-2015-010488), 2016-03-16
Supplement: bmjopen-2015-010488supp.pdf [file bmjopen-2015-010488supp.pdf]

## Appendix

### Interprofessional collaboration to improve patient adherence to therapy- a qualitative study

#### Focus group protocol

##### Questions:

Question 1: In your experience how much of an issue is non-adherence to long term medication amongst your patients on chronic therapy?

Question 2: What do think are the most common reasons that your patients don't take their medication as prescribed?

Question 3: What strategies do or your staff use in your practice to identify patients who may be non-adherent to their medication(s)? (need examples)

Question 4: What strategies do or your staff use to identify patients who may be at risk of being non-adherent to their medication(s)? (need examples)

Question 5: Once you have identified non-adherence, how do you address the problem.? (need examples)

Question 6: Once you have addressed the issues that may have contributed to the non-adherence, how do you then monitor the patient's adherence over time?

Question 7: Thinking about the strategies you use to address non adherence, how effective would you say they are in the short and the longer term?

Question 8: In your view what more could be done to ensure that your patients continue to use their medications as prescribed over the long term?

Question 9: What are your thoughts about an inter-professional approach to promoting medication adherence? Who should be involved?

Question 10: What do you believe would constitute an inter-professional and collaborative approach to delivering interventions to promote adherence?
